# Supplementary material for: Synthesis of small gold nanoparticles: Au(i) disproportionation catalyzed by a persulfurated coronene dendrimer
Source: Royal Society of Chemistry journal article supplement (doi:10.1039/b708115d), 2007-01-01
Supplement: b708115d.pdf [file b708115d.pdf]

## Supporting Information

### Synthesis of Small Gold Nanoparticles: Au(I) Disproportionation Catalyzed by a Persulfurated Coronene Dendrimer

Giacomo Bergamini,<sup>a</sup> Paola Ceroni,<sup>a\*</sup> Vincenzo Balzani,<sup>a</sup> Marc Gingras,<sup>b\*</sup>  
Jean-Manuel Raimundo,<sup>b</sup> Vittorio Morandi,<sup>c</sup> Pier Giorgio Merli<sup>c</sup>

#### Experimental section.

AuCl, HAuCl<sub>4</sub> (high purity reagents 99.9%) and 11-mercapto-1-undecanol (97%) were obtained from Aldrich and used in acetonitrile solution.

**Synthesis.** The purity and the characterization of compound **1** were ascertained by <sup>1</sup>H and <sup>13</sup>C NMR; MALDI-tof spectra confirmed 12 substitutions.

**Photophysical experiments.** All the experiments were carried out in dichloromethane solution at 298 K unless otherwise noted. UV-Vis absorption spectra were recorded with a Perkin Elmer λ40 spectrophotometer, using quartz cells with pathlength of 1.0 cm. The estimated experimental errors are: ±2 nm on the band maximum, 5% on the molar absorption coefficient.

**HR-TEM experiments.** The Transmission Electron Microscopy (TEM) observations have been performed with a FEI TECNAI F20 TEM equipped with a Schottky emitter and operating at 200 keV. The sample was prepared by evaporating at room temperature and atmospheric pressure a drop of diluted solution ([**1**] = 7.5×10<sup>-6</sup> M, [Au<sup>+</sup>] = 2.3 ×10<sup>-4</sup> M) on a copper grid with a carbon foil. Size distribution was evaluated by Scion Image program: particles with d < 0.7 nm are not reported because they are below instrument resolution.

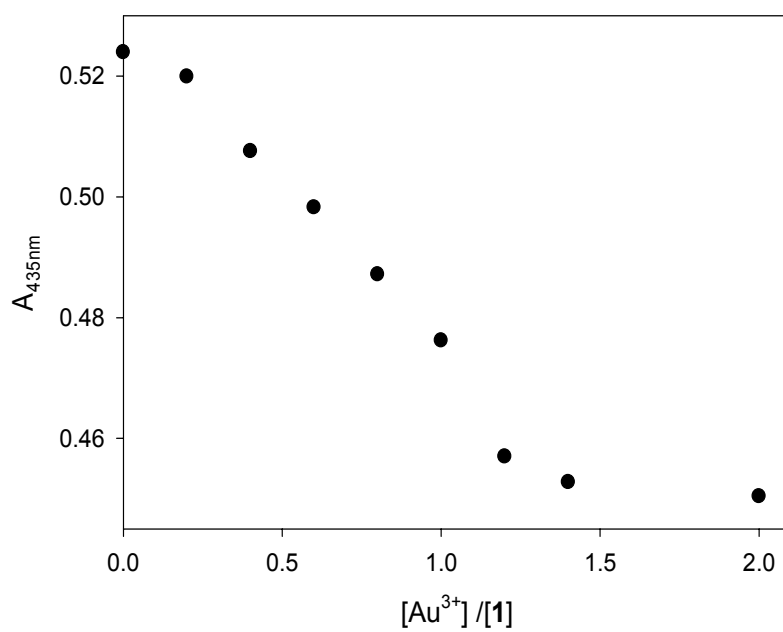

**Figure 1.** Absorbance changes at 435 nm upon titration of compound **1** in dichloromethane ( $7.5 \times 10^{-6}$  M) with  $H[AuCl_4]$
